# Supplementary material
Source: PubMed Central journal article supplement (PMC5399608)

SUPPLEMENTARY DATA

**Mafa enables Pdx1 to effectively convert pancreatic islet progenitors and committed islet  $\alpha$ -cells into  $\beta$ -cells *in vivo***

Taka-akiMatsuoka<sup>1,\*</sup>, Satoshi Kawashima<sup>1</sup>, Takeshi Miyatsuka<sup>1,2</sup>, Shugo Sasaki<sup>1</sup>, Naoki Shimo<sup>1</sup>, Naoto Katakami<sup>1</sup>, Dan Kawamori<sup>1</sup>, Satomi Takebe<sup>1</sup>, Pedro L. Herrera<sup>3</sup>, Hideaki Kaneto<sup>4</sup>, Roland Stein<sup>5</sup>, Ichiro Shimomura<sup>1</sup>

<sup>1</sup>Department of Metabolic Medicine , Osaka University Graduate School of Medicine , 2-2 Yamadaoka , Suita , Osaka 565 - 0871 , Japan

<sup>2</sup>Center for Molecular Diabetology, Juntendo University Graduate School of Medicine, Tokyo, Japan

<sup>3</sup> Department of Genetic Medicine and Development, University of Geneva Faculty of Medicine, CH-1211 Geneva 4, Switzerland

<sup>4</sup> Department of Diabetes, Endocrinology and Metabolism, Kawasaki Medical School, Okayama, Japan

<sup>5</sup> Department of Molecular Physiology & Biophysics, Vanderbilt University Medical School, 723 Light Hall, Nashville, TN 37232, U.S.A.

\*Corresponding author

SUPPLEMENTARY DATA

**Supplementary Figure 1.  $Pdx1^{flag}$  is expressed in most P0.5 and 6W *Ngn3-Cre;CAT-Pdx1* islet cells.** Flag staining (red) was observed in most of *Ngn3-Cre;CAT-Pdx1* insulin<sup>+</sup>(blue) and glucagon<sup>+</sup>(green) cells at P0.5 and 6W; the Crepenetrance rate was a maintained at approximately 95%. Scale bars: 50  $\mu$ m.

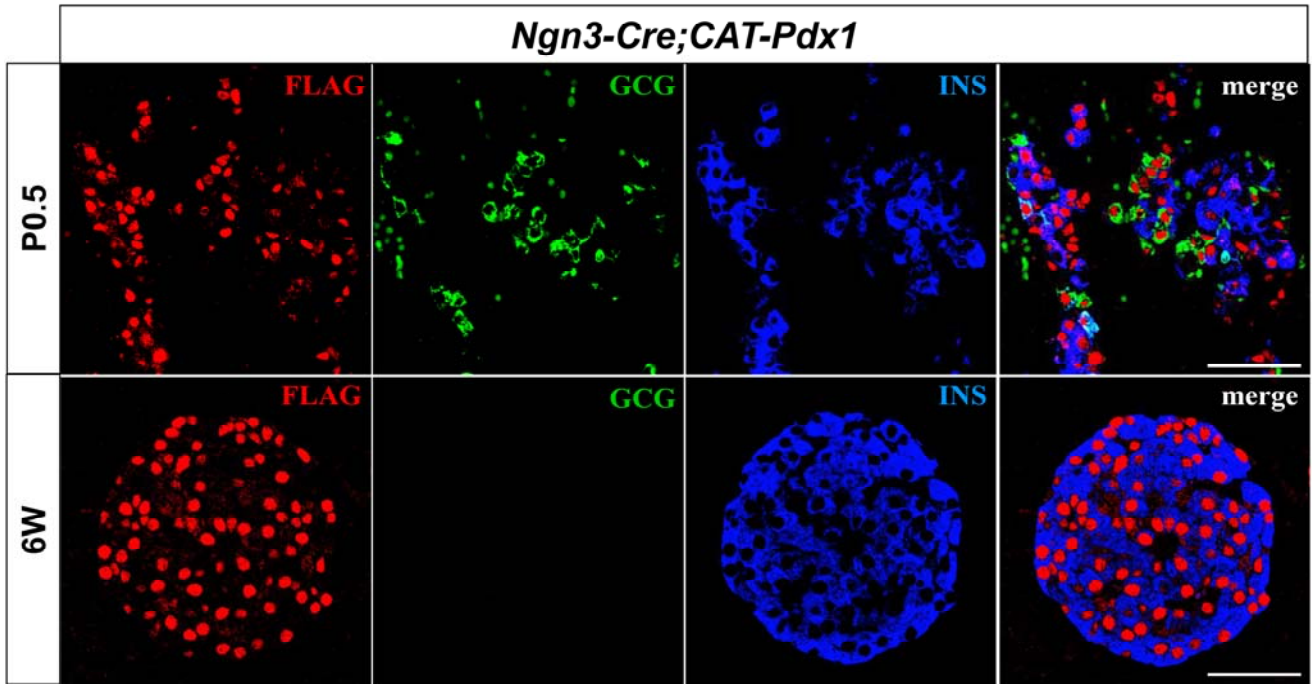

SUPPLEMENTARY DATA

**Supplementary Figure 2. There were not any TUNEL<sup>+</sup> apoptosis observed within Mafa<sup>myc</sup> and/or Pdx1<sup>flag</sup> expressing islet cells.** TUNEL staining was performed with (A) P0.5, and (B) 6W *Ngn3-Cre;CAT-Mafa;CAT-Pdx1* and *Ngn3-Cre;CAT-Pdx1* mice. The arrows mark the insulin and glucagon double positive cells. No TUNEL<sup>+</sup> cells (green) were found within islet glucagon<sup>+</sup> (red) or insulin<sup>+</sup> (blue) cells. Note: the green staining was shown to be within red blood cells. (C) The C57BL/6 *Ins2<sup>Akita</sup>* (Akita) mouse, an ER stress induced apoptosis model, was used as a control to observe TUNEL<sup>+</sup> β-cells. Scale bars: 50 μm.

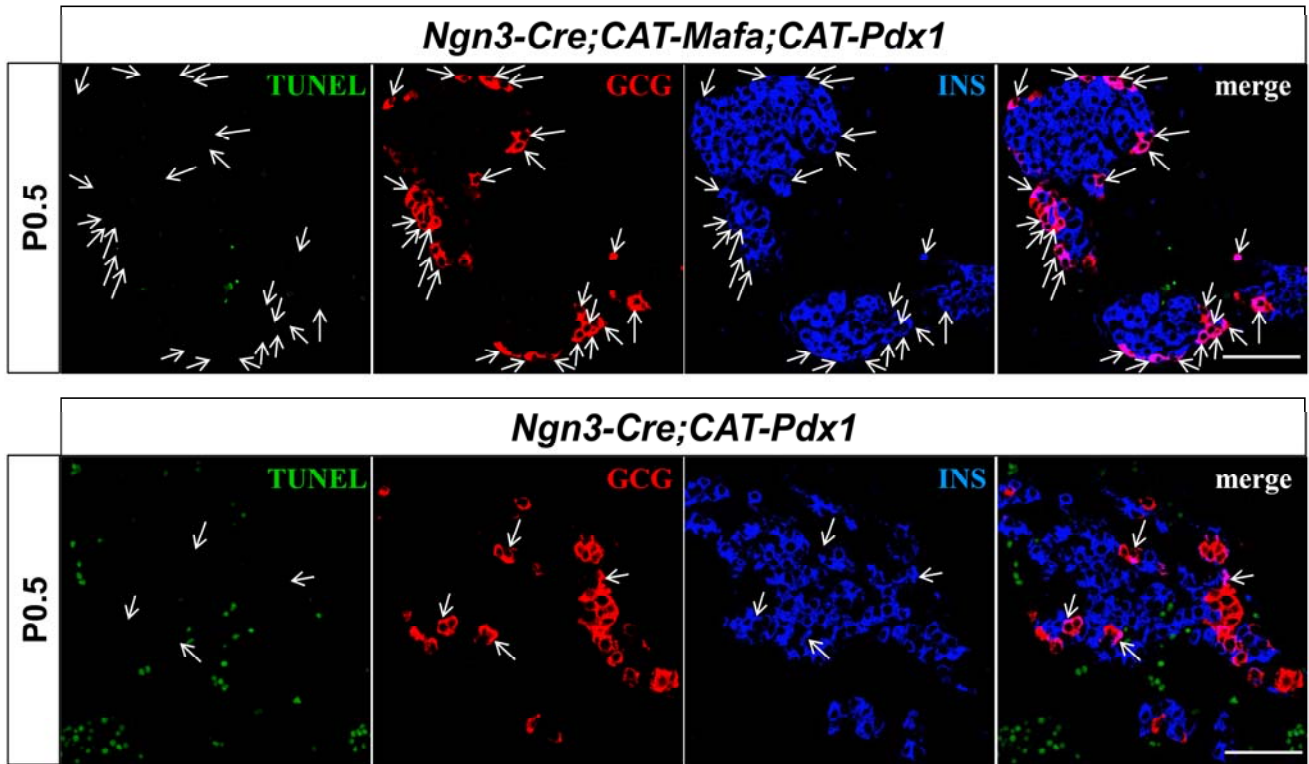

SUPPLEMENTARY DATA

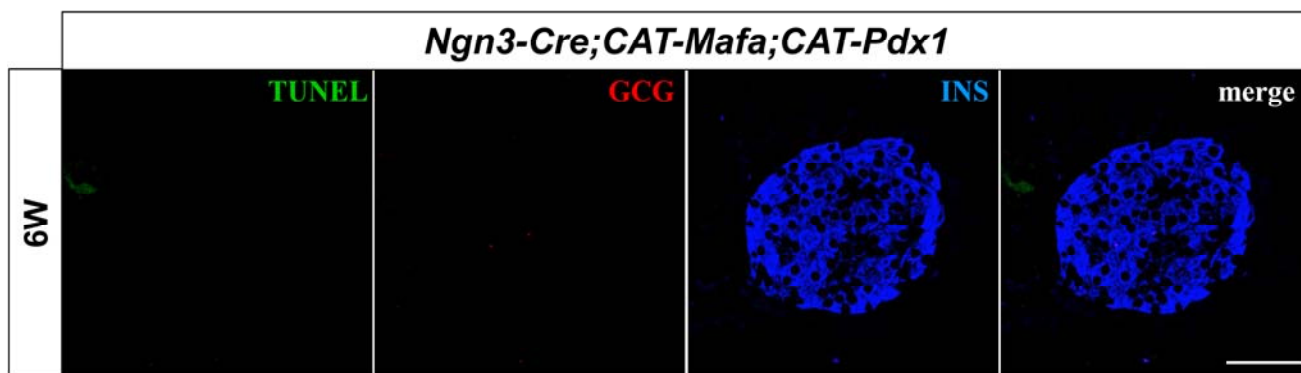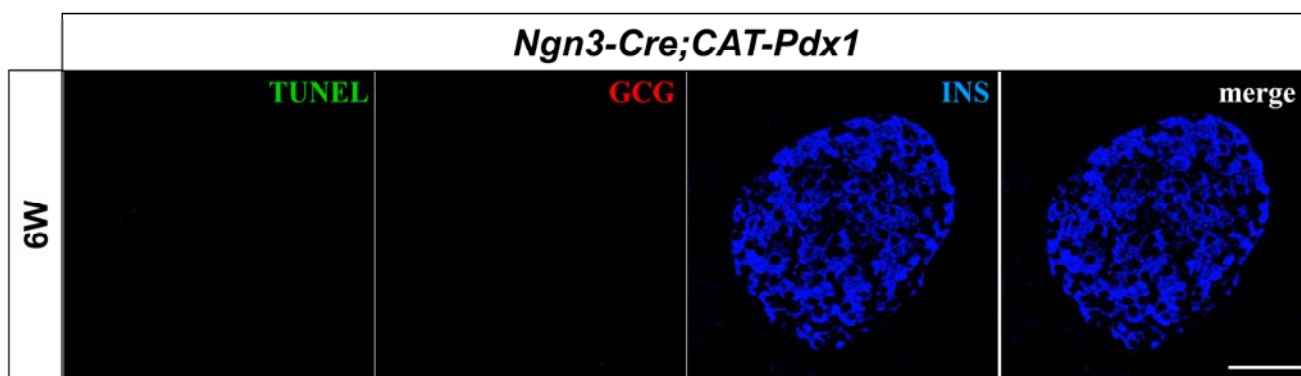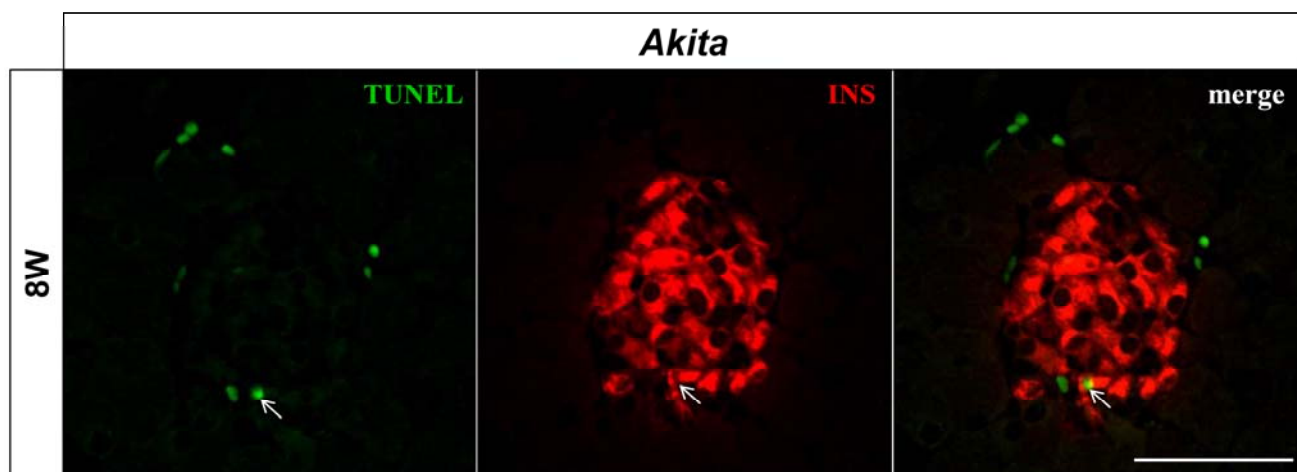

SUPPLEMENTARY DATA

**Supplementary Figure 3. PP and d cells produce Pdx1<sup>flag</sup> in *Ngn3-Cre;CAT-Pdx1* and *Ngn3-Cre;CAT-Mafa;CAT-Pdx1* islets.** Pdx1<sup>flag</sup> epitope staining (red) was observed in most A) *Ngn3-Cre;CAT-Pdx1* and B) *Ngn3-Cre;CAT-Mafa;CAT-Pdx1* islets. Pdx1<sup>flag</sup> (red), insulin (blue), PP (green), and somatostatin (green) cells in 6W islets. However, PP<sup>+</sup> cells are seldom observed in 6W *Ngn3-Cre;CAT-Pdx1;CAT-Mafa* islets. The green staining for PP in 6W *Ngn3-Cre;CAT-Pdx1;CAT-Mafa* islets was only found in red blood cells. The arrows mark insulin and somatostatin double positive cell. Scalebars: 50 μm.

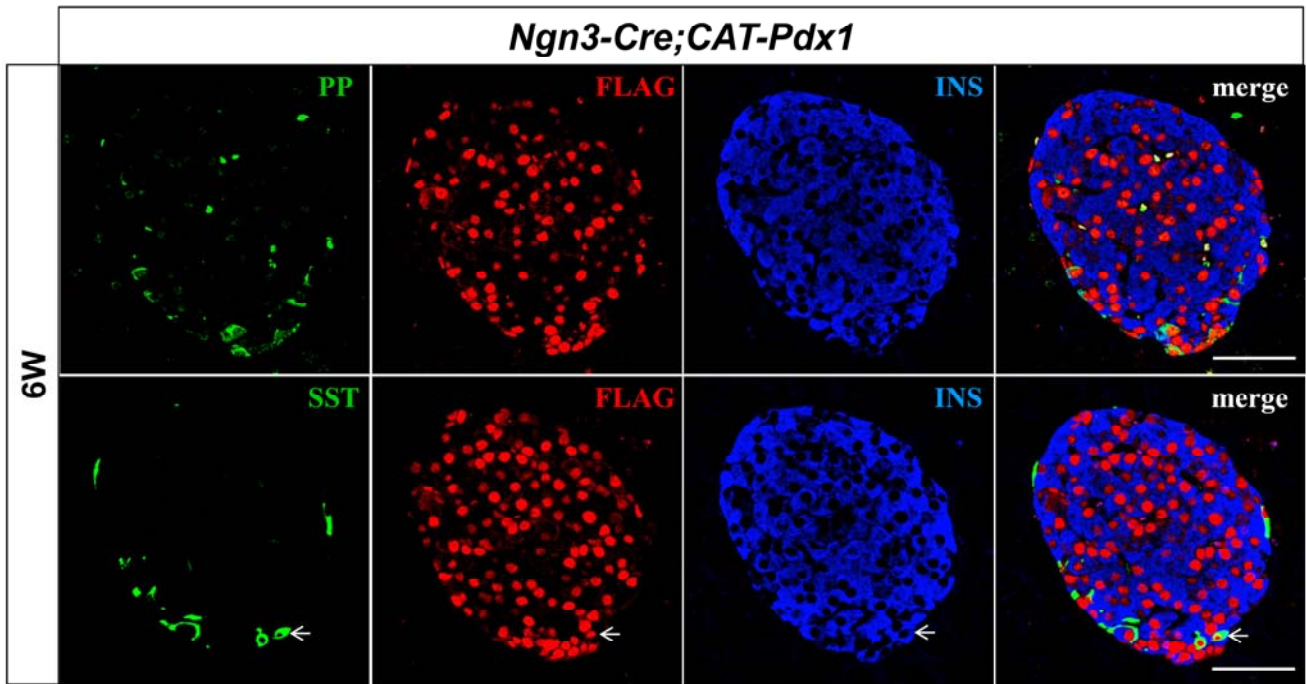

SUPPLEMENTARY DATA

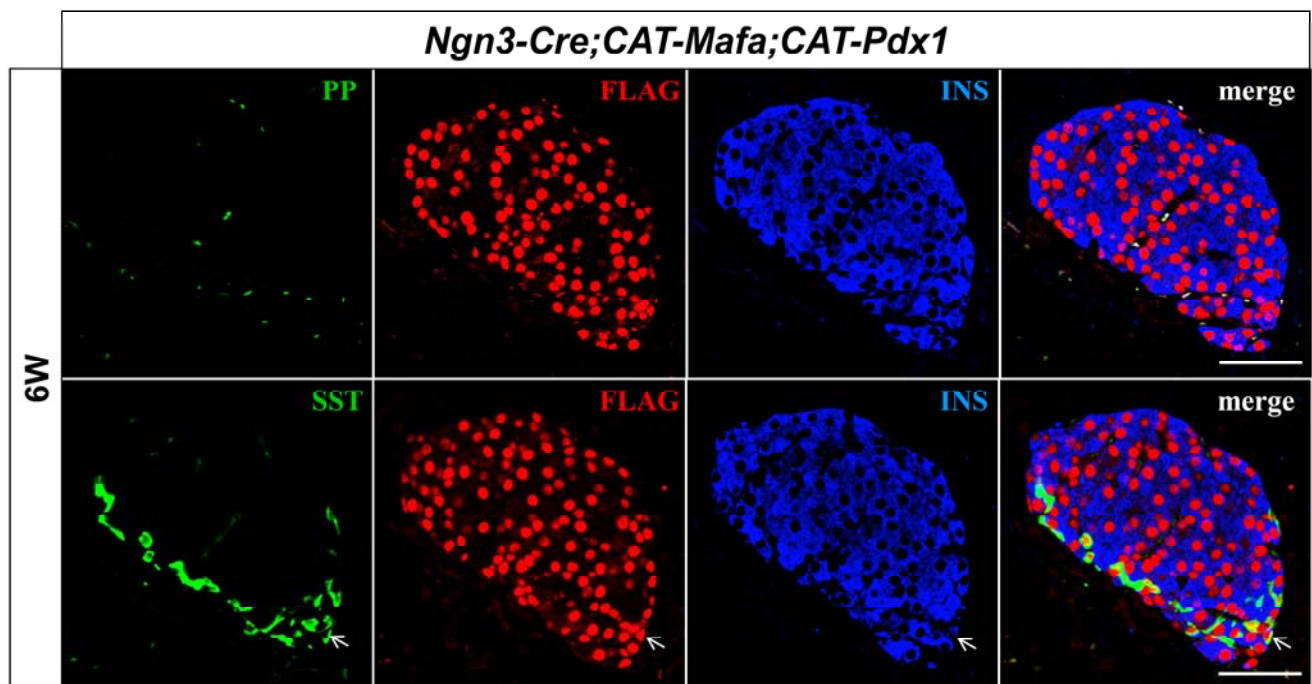

SUPPLEMENTARY DATA

**Supplementary Figure 4. *Mafa*<sup>myc</sup> + *Pdx1*<sup>flag</sup> expression does not affect islet PP- and  $\delta$ -cell levels in *Gcg-Cre;CAT-Mafa;CAT-Pdx1* islets.** The *ROSA26*-driven  $\beta$ -gal (red) was used to trace the  $\alpha$ -cell fate in PP (green) and somatostatin (SST,green) cells. Notably, there was no evidence of  $\beta$ -gal expression in these 2 week-old *Gcg-Cre;CAT-Mafa;CAT-Pdx1* islet cells. Scale bars: 50  $\mu$ m.

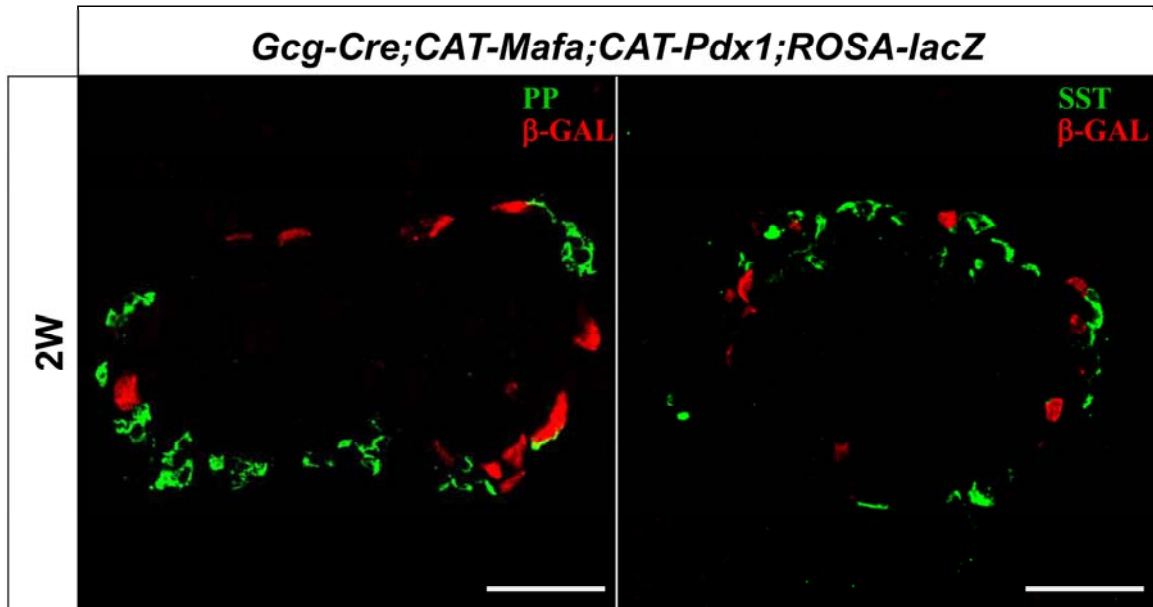

SUPPLEMENTARY DATA

**Supplementary Figure 5. MafA<sup>myc</sup> + Pdx1<sup>flag</sup> induces insulin production in pancreatic  $\alpha$ -cells.** To trace the cell fate of the  $\alpha$ -cell smisexpressing MafA<sup>myc</sup> + Pdx1<sup>flag</sup> in *Gcg-Cre;CAT-Mafa;CAT-Pdx1* mice , (A) flag- and myc-tagged staining (red) was compared in glucagon (blue) and insulin (green). (B) Tagged Mafa- and Pdx1- expressing  $\alpha$ -cells were also traced by immunostaining for GFP (green), insulin (blue) , and glucagon (red) in *Gcg-Cre;CAT-Mafa;CAT-Pdx1;ROSA-GFP* mice. Significantly ,most of Pdx1<sup>flag</sup>, MafA<sup>myc</sup>, and GFP co-positive cells are only insulin<sup>+</sup> in 2 week-old *Gcg-Cre;CAT-Mafa;CAT-Pdx1* islets (indicated by arrows).Scale bars: 50 $\mu$ m.

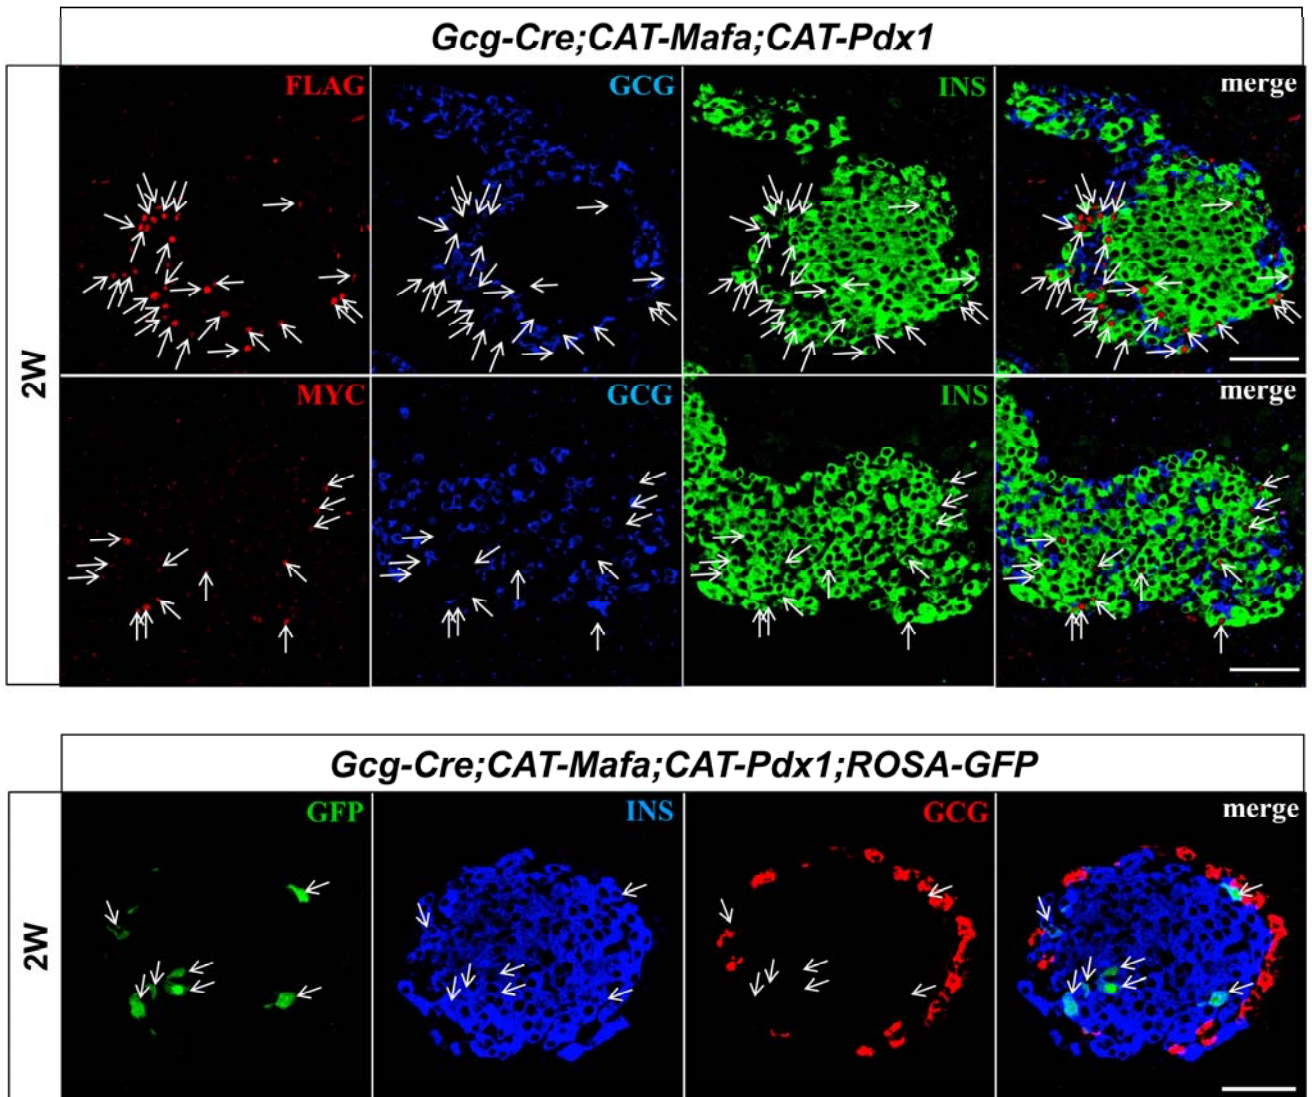



SUPPLEMENTARY DATA

**Supplementary Figure 6.** There was not a marked change in the level of a-cell transdifferentiation between 2W and 6W *Gcg-Cre; CAT-Mafa; CAT-Pdx1* islets. Approximately 75% of  $Pdx1^{flag}$  expressing cells were insulin<sup>+</sup> in *Gcg-Cre; CAT-Mafa; CAT-Pdx1* islets. The arrows indicate flag and insulin double positive cells. Scale bars: 50 $\mu$ m.

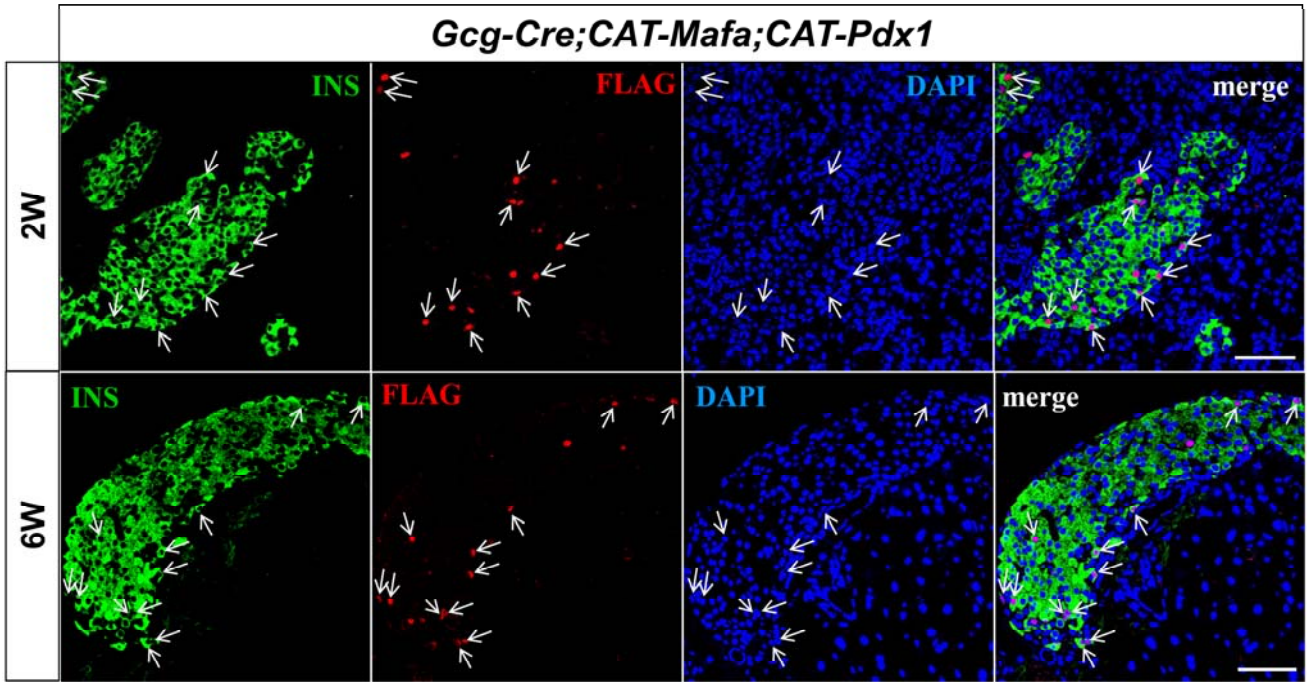

SUPPLEMENTARY DATA

**Supplementary Figure 7.** There were no TUNEL<sup>+</sup> Pdx1<sup>flag</sup> expressing cells in 2W and 6W *Gcg-Cre;CAT-Mafa;Cat-Pdx1* islets. TUNEL<sup>+</sup> (green) , flag<sup>+</sup> (red) ,and insulin<sup>+</sup> (blue) staining is shown. Flag<sup>+</sup> cells were indicated by arrows. The green staining cells was only found in red blood cells. Scale bars: 50μm.

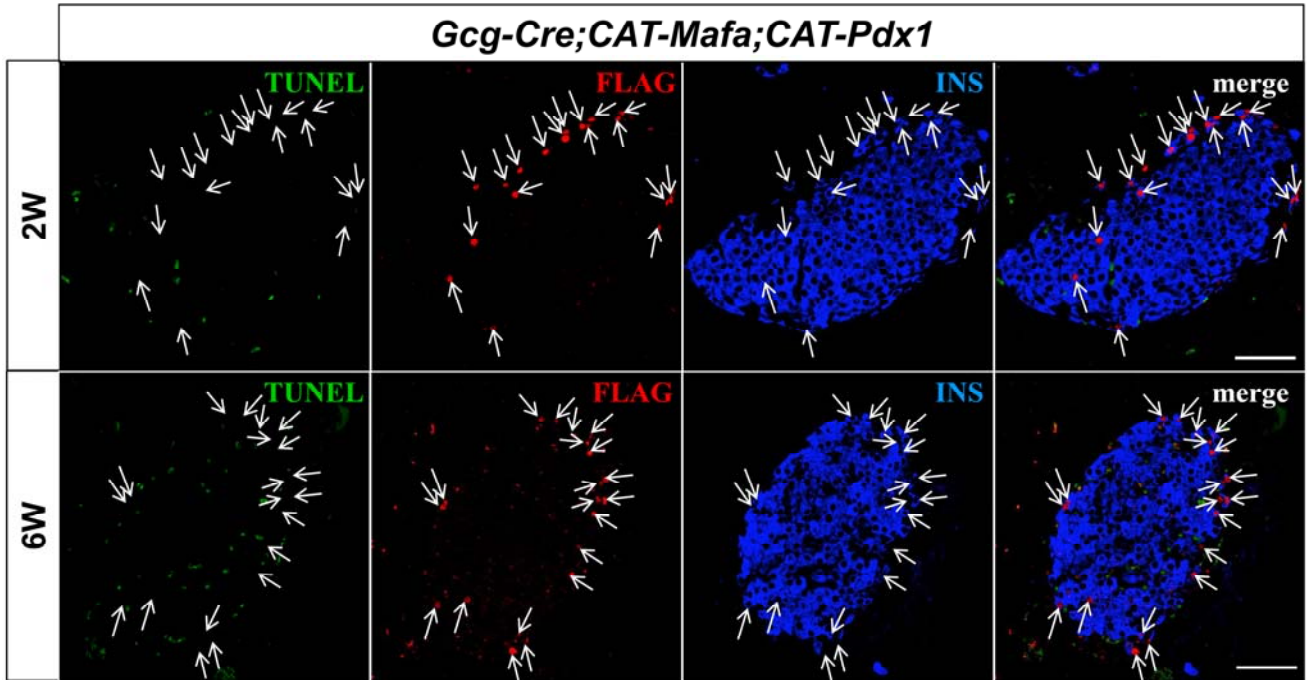

SUPPLEMENTARY DATA

**Supplementary Figure 8. Only monohormonal islet insulin<sup>+</sup> cells are generated upon MafA<sup>myc</sup> + Pdx1<sup>flag</sup> expression in embryonic  $\alpha$ -cells.** Flag (green), myc (red), insulin (blue), and glucagon (blue) immunostaining was performed in *Gcg-Cre;CAT-Mafa;CAT-Pdx1* islets. Only insulin<sup>+</sup> cells were produced upon simultaneous production of the tagged transcription factors (indicated by arrows) in developing  $\alpha$ -cells. Scale bars: 50  $\mu$ m.

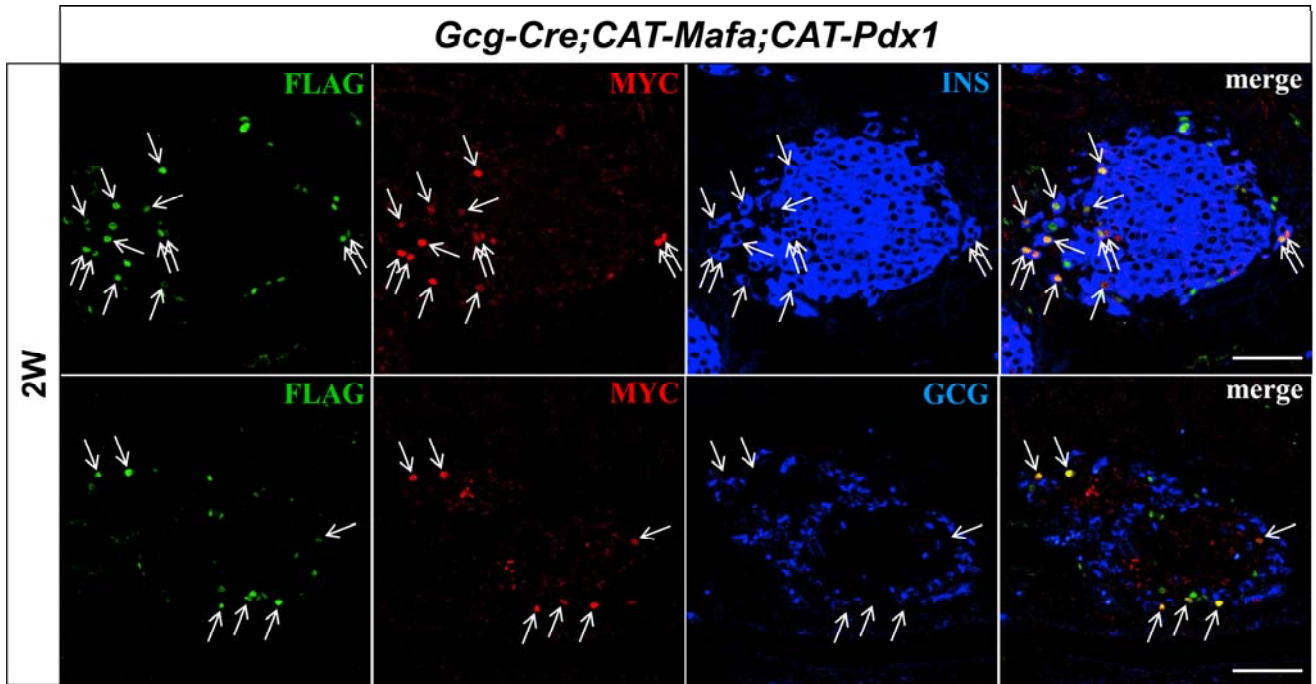

SUPPLEMENTARY DATA

**Supplementary Figure 9. Ucn3 expression is gained and Arx compromised upon  $\alpha$ -cell conversion to  $\beta$ -like cells in *Gcg-Cre;CAT-Mafa;CAT-Pdx1* islets. (A) The islet Ucn3 (red)  $\beta$ -cell-enriched and GSIS-regulating protein is detectable in 46% of Pdx1 flag (green) cells within 2W *Gcg-Cre;CAT-Mafa;CAT-Pdx1* islets (indicated by arrows). (B) The  $\alpha$ -cell-specific Arx transcription factor (green) was present in roughly 21% of FLAG<sup>+</sup>(red) cells. FLAG<sup>+</sup> and Arx-cells are marked by arrows. Notably, Arx expression was eventually silenced in the islet $\beta$ -cells produced upon misexpressing Pdx1 in Ngn3<sup>+</sup> progenitors (19). Scale bars: 50  $\mu$ m.**

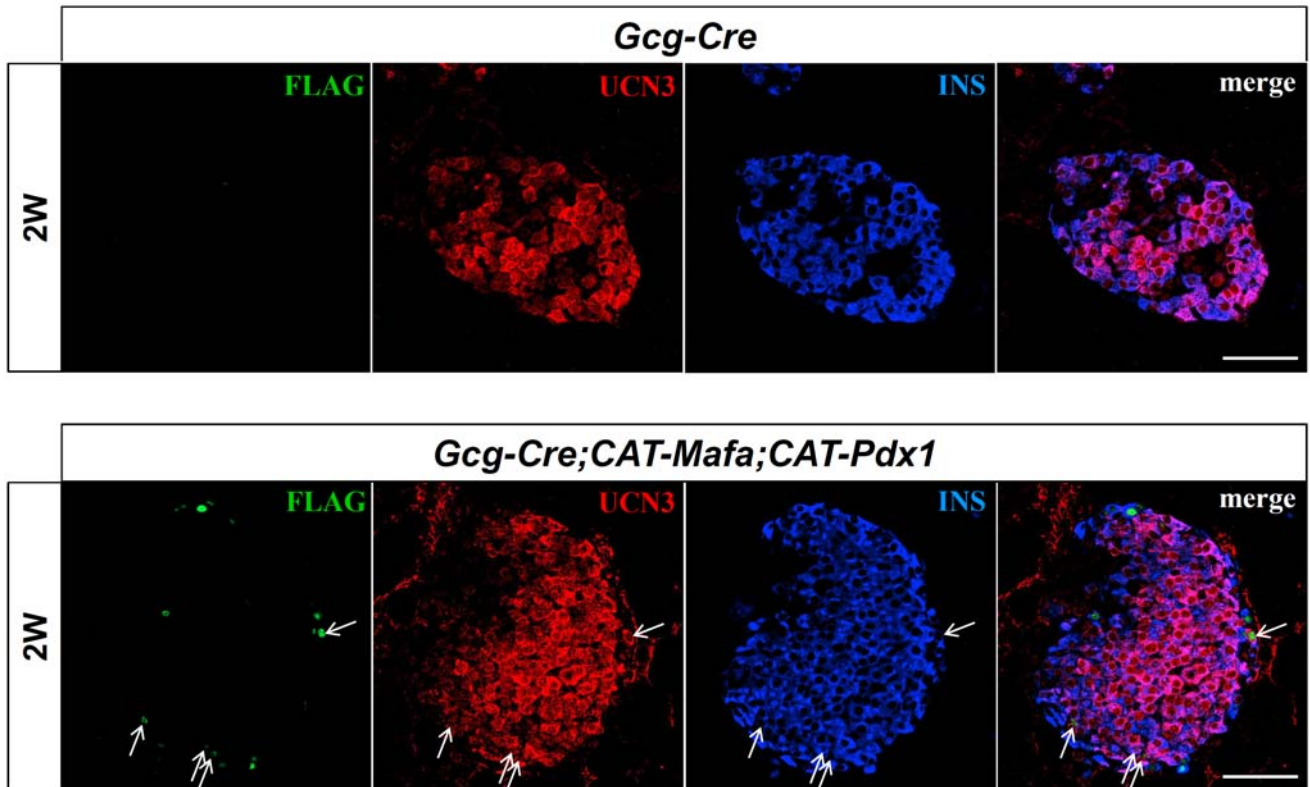

SUPPLEMENTARY DATA

*Gcg-Cre;CAT-Mafa;CAT-Pdx1* (2W)

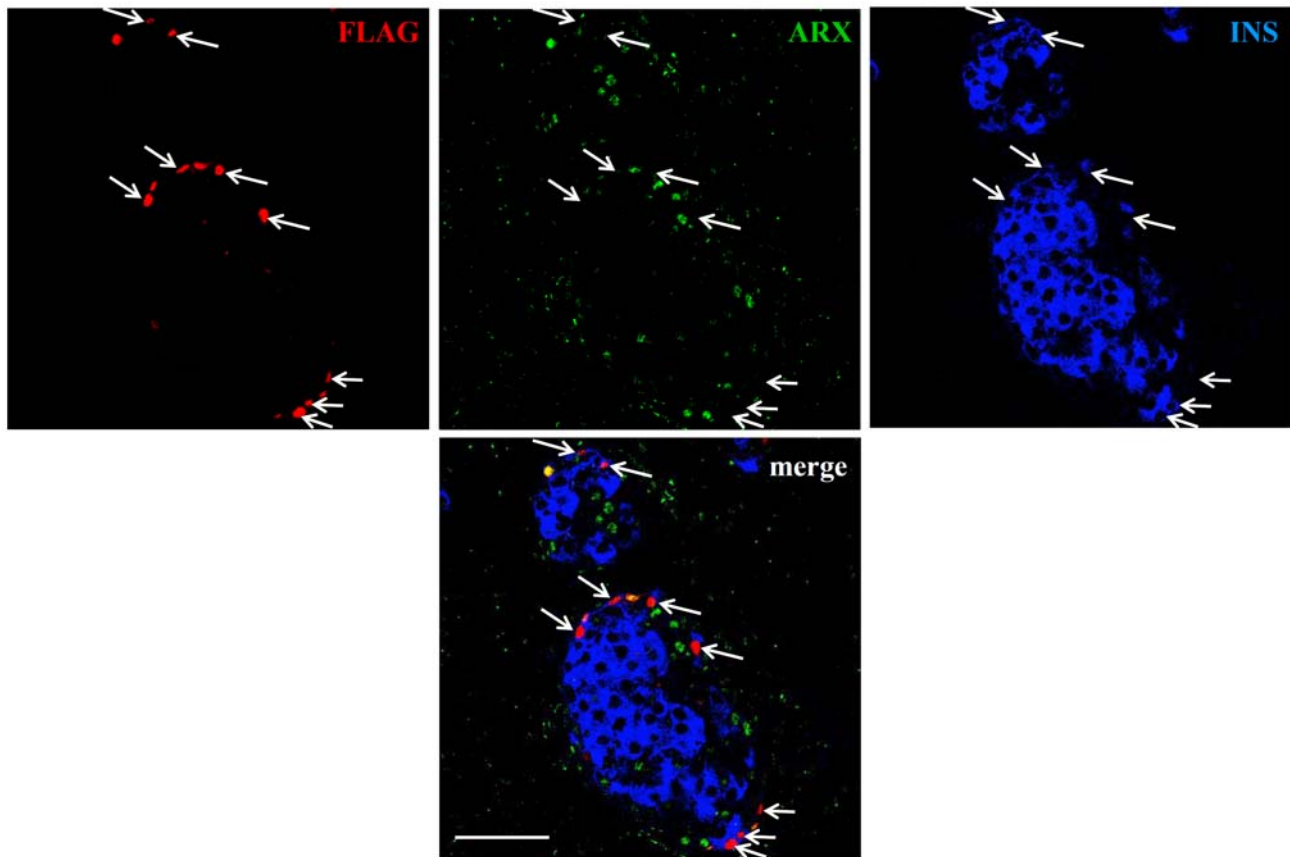

Supplement: DB160887SupplementaryData.pdf [file DB160887SupplementaryData.pdf]
